# Supplementary material
Source: PubMed Central journal article supplement (PMC9461481)

# Intention to get Vaccinations Against COVID-19 in Duhok Healthcare Workers: A Cross Sectional Survey

We as EPI Section, preventive Health Directorate, Duhok intended to make this survey aimed at assesseing the intension of Duhok healthcare workers to get vaccination gainst COVID-19 and schedule timetable for those intending to get the vaccine when it become available. If you agree to participate in this survey please fill the following and send it back. The information that you share with us, will remain confidential.

OK

## Province

- Duhok  
 Others

## District

- AKRE  
 AMEDI  
 BARDARASH  
 DAHUK  
 SHEKHAN  
 SUMEL  
 ZAKHO  
 OTHER

## Health facility

---

## Age

---

**Gender**

- MALE
- FEMALE

**Highest education level**

- Postgraduate
- Graduate of University (Bachelor)
- Diploma (Institute)
- Secondary High School
- Intermediate or Primary School

**Professions**

- Physician
- Pharmacist
- Dentist
- Paramedic
- Nurse
- Assistant nurse
- Midwife
- Physiotherapist
- Others (administrative staff, laboratories staff, research staff)
- Volunteer
- Student

**Department**

- COVID- Health facility (Hospitals)
- Non-COVID-Health facility (Hospitals)
- ICU
- ER
- PHC (Centers / Sections / District)

**Did you get COVID-19?**

- YES
- NO

**Do you have an existing chronic disease such as cancer, cardiovascular disease, diabetes, etc?**

- YES
- NO

**How do you rate your overall health?**

- Very good
- Good
- Fair
- Poor
- Very poor

**If vaccine against COVID-19 is available in the health facility, would you take it?**

- YES
- NO

**If above answer is YES only write your full Name:**

---

**Phone Number**

---

**Perceived barriers of COVID-19 vaccination (You can tick one or more)**

- Worry the possible side-effects of COVID-19 vaccination would interfere with my usual activities
- I am concern about the efficacy of the COVID-19 vaccination
- I am concern about the safety of the COVID-19 vaccination
- I am concern of my affordability of getting the COVID-19 vaccination
- I am concern of the faulty/fake COVID-19 vaccine
- I am already experienced COVID-19, I don't need the vaccine
- I am not confident in using COVID-19 vaccine
- I am Pregnant worry about my fetous
- I heard from social media that the vaccine is not good
- Others

**If Others (Speicify\_)**

---

Add your location on map by clicking the GPS symbol (if you agree for that)

latitude (x.y °)

---

longitude (x.y °)

---

altitude (m)

---

accuracy (m)

---

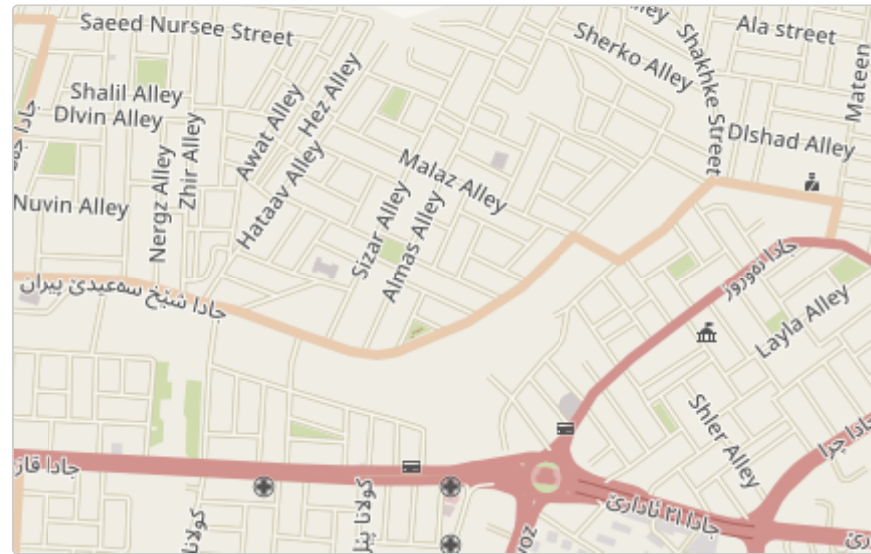

Supplement: mmc2.pdf [file mmc2.pdf]
